# Supplementary material for: Changes in mean serum lipids among adults in Germany: results from National Health Surveys 1997-99 and 2008-11
Source: PubMed Central journal article supplement (PMC4784325; doi:10.1186/s12889-016-2826-2), 2016-03-08
Supplement: 12889_2016_2826_MOESM1_ESM.pdf [file 12889_2016_2826_MOESM1_ESM.pdf]

Changes in mean serum lipids among adults in Germany: Results from National Health Surveys 1997-99 and 2008-11

Additional File 1

**Tab. S1** Dietary Variables in GNHIES98 and DEGS1

| Dietary variable                  | GNHIES98                                                                                                         | DEGS1                                                                                                                                                 | Categories                        |
|-----------------------------------|------------------------------------------------------------------------------------------------------------------|-------------------------------------------------------------------------------------------------------------------------------------------------------|-----------------------------------|
| Daily coffee consumption          | One item:<br>Coffee                                                                                              | One item:<br>Coffee                                                                                                                                   | Yes<br>No                         |
| Daily processed foods consumption | Six items:<br>Fast food, fried potatoes, cakes and cookies, crisps and cracker, candy and chocolate, soft drinks | Twelve items:<br>Hamburger/kebab, fried sausages, pizza, fried potatoes, French fries, cakes, cookies, crisps, cracker, candy, chocolate, soft drinks | Yes<br>No                         |
| Wholegrain bread consumption      | One item:<br>Wholegrain bread                                                                                    | One item:<br>Wholegrain bread                                                                                                                         | Never<br>Less than daily<br>Daily |
| High alcohol consumption          | Four items:<br>Non-alcoholic-beer, beer, wine, spirits                                                           | Five items:<br>Non-alcoholic-beer, beer, wine, spirits, cocktails                                                                                     | Yes<br>No                         |
